# Supplementary material
Source: Springer Nature journal article supplement (https://www.springermedizin.de/resource/supplementary/12947_2014_512_MOESM3_ESM.pdf/9555926)

**a** Bland Altman between readers using edge-detection (n=20)

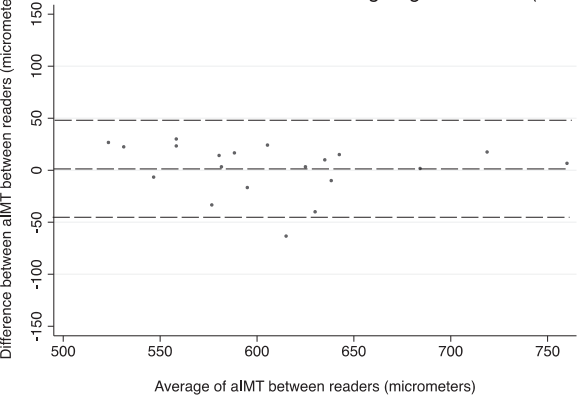

**b** Bland Altman between readers using manual caliper (n=290)

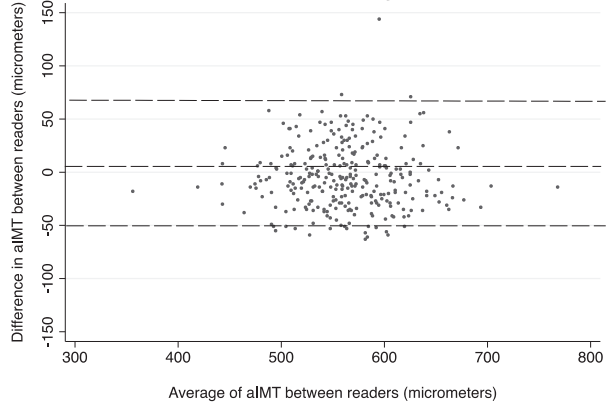

**c** Bland Altman between edge detection and manual caliper (n=290)

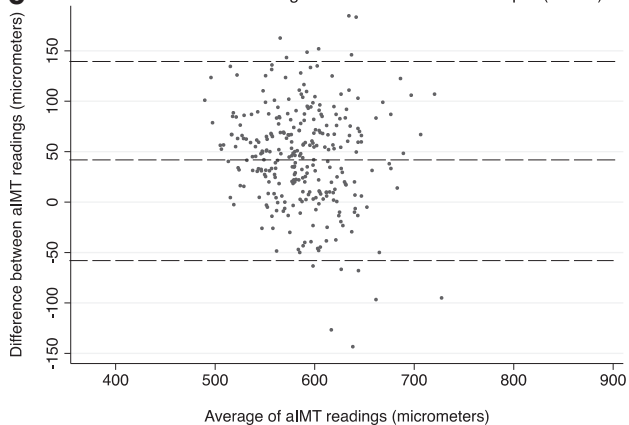

Supplement: MOESM3 [file 9555926]
